# Supplementary material for: The HKA Test Revisited
Source: Oxford University Press journal article supplement (doi:10.1534/genetics.104.026500), 2004-10-01
Supplement: supp_table1.pdf [file supp_table1.pdf]

Supplementary Table 1

| Locus <sup>1</sup> | n  | L <sub>s</sub> <sup>2</sup> | S <sub>s</sub> <sup>3</sup> | D <sup>4</sup> |
|--------------------|----|-----------------------------|-----------------------------|----------------|
| 1 AT1G01040        | 18 | 117                         | 3                           | 19             |
| 2 AT1G06520        | 20 | 122                         | 0                           | 19             |
| 3 AT1G06530        | 17 | 108                         | 1                           | 15             |
| 4 AT1G10900        | 22 | 122                         | 7                           | 11             |
| 5 AT1G10980        | 8  | 123                         | 0                           | 13             |
| 6 AT1G11050        | 17 | 132                         | 0                           | 25             |
| 7 AT1G15240        | 20 | 120                         | 0                           | 14             |
| 8 AT1G19800        | 21 | 152                         | 0                           | 23             |
| 9 AT1G23200        | 4  | 136                         | 5                           | 20             |
| 10 AT1G36310       | 20 | 125                         | 26                          | 51             |
| 11 AT1G36370       | 21 | 120                         | 6                           | 22             |
| 12 AT1G36730       | 24 | 119                         | 0                           | 34             |
| 13 AT1G62310       | 18 | 136                         | 1                           | 23             |
| 14 AT1G62390       | 15 | 125                         | 6                           | 15             |
| 15 AT1G62520       | 18 | 134                         | 6                           | 33             |
| 16 AT1G64170       | 16 | 130                         | 9                           | 24             |
| 17 AT1G68520       | 4  | 117                         | 0                           | 21             |
| 18 AT1G68530       | 18 | 132                         | 0                           | 16             |

<sup>1</sup>, Locus names correspond to those from the genome project of *A. thaliana*

<sup>2</sup>, numbers of synonymous sites

<sup>3</sup>, number of segregating synonymous sites

<sup>4</sup>, number of synonymous substitutions between *A. lyrata* and *A. thaliana*, calculated using the method of Nei and Gojobori (1986)

#### References

Nei, M. and T. Gojobori (1986). Simple methods for estimating the numbers of synonymous and nonsynonymous nucleotide substitutions. *Mol. Biol. Evol.* 3:418-426.
